# Supplementary material
Source: MDPI journal article supplement (https://www.mdpi.com/2311-5629/3/1/5)
Supplement: s1 [file s1]

**Supplementary Materials: Electrode Surface Composition of Dual-Intercalation,
All-Graphite Batteries**

Boris Dyatkin, Joseph Halim and Jeffrey A. Read

Table S1. XPS-derived peak deconvolution analysis to demonstrate the relative prevalence of different functional groups in MesoCarbon MicroBeads (MCMB) and Synthetic Flakes of Graphite (SFG) particles.

| **Material** | **Region** | **Peak Position (eV)** | **FWHM [eV]** | **Fraction** | **Assignment** |
| --- | --- | --- | --- | --- | --- |
| MCMB: Oxidized | C 1s | 284.4  284.8  286.5 | 0.5  1.0  1.4 | 0.42  0.53  0.05 | C–C sp2 C–H or C–C sp3  C–O |
| O 1s | 532.5 | 3.1 | 1 | C–O |
| MCMB: Hydrogenated | C 1s | 284.5  284.9  286.5 | 0.6  1.1  1.4 | 0.45  0.50  0.05 | C–C sp2 C–H or C–C sp3 C–O |
| O 1s | 532.7 | 2.7 | 1 | C–O |
| SFG: Oxidized | C 1s | 284.4  284.8  286.5 | 0.6  1.1  1.4 | 0.53  0.43  0.04 | C–C sp2 C–H or C–C sp3 C–O |
| O 1s | 532.4 | 2.9 | 1 | C–O |


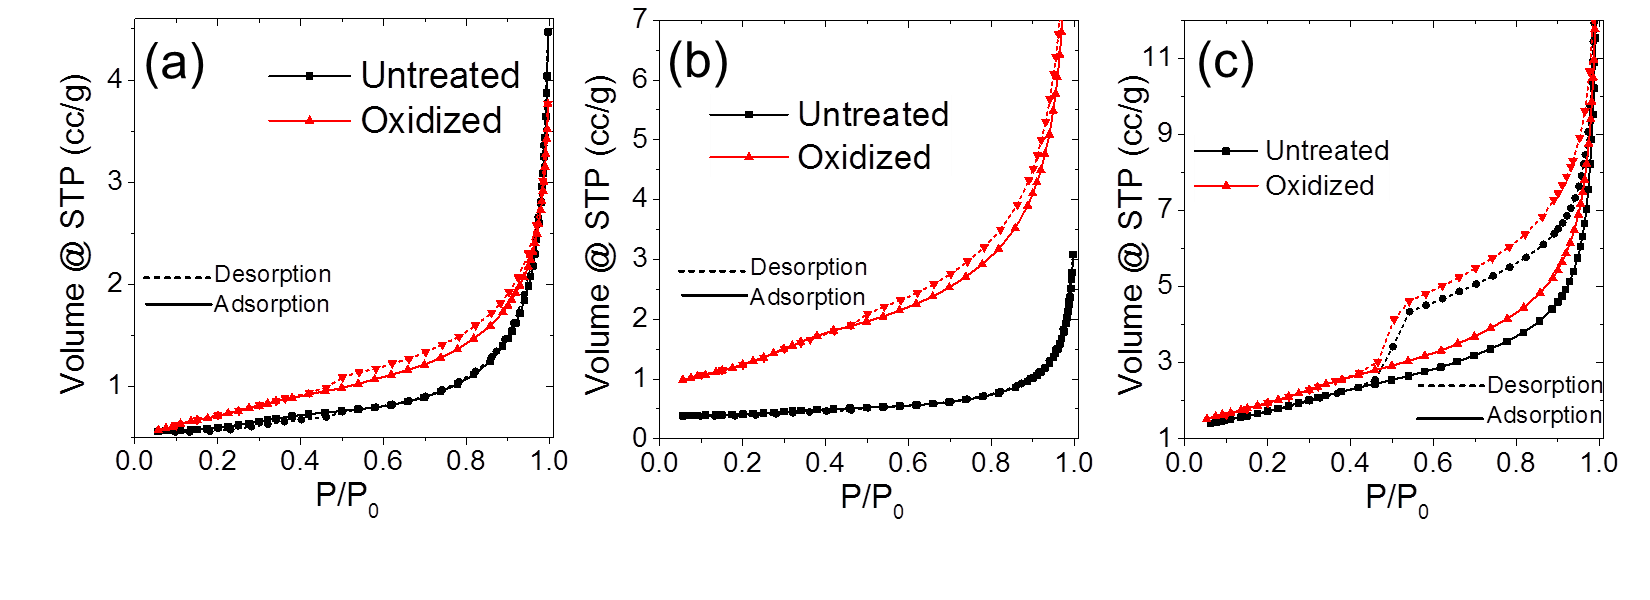


Figure S1. N2 sorption isotherms of (a) MCMB, (b) SFG, and (c) ConocoPhillips Graphite Particles (CGP) before and after high-temperature air oxidation.


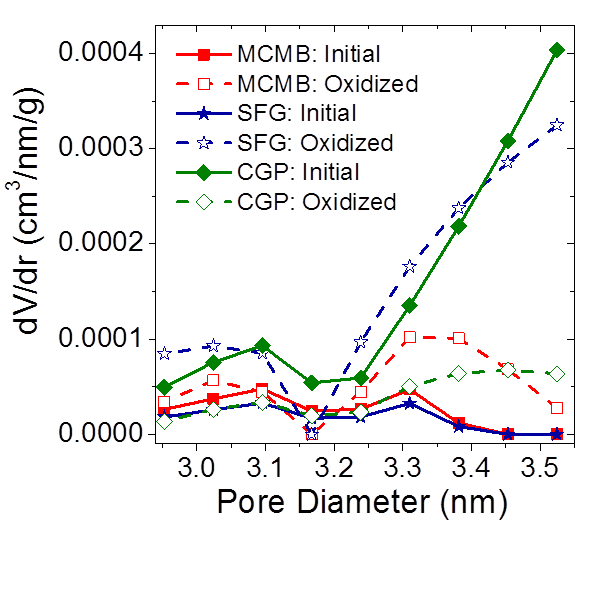


Figure S2. Porosity analyses (derived from gas sorption using DFT modeling) of external surfaces of graphite electrodes before and after air oxidation.


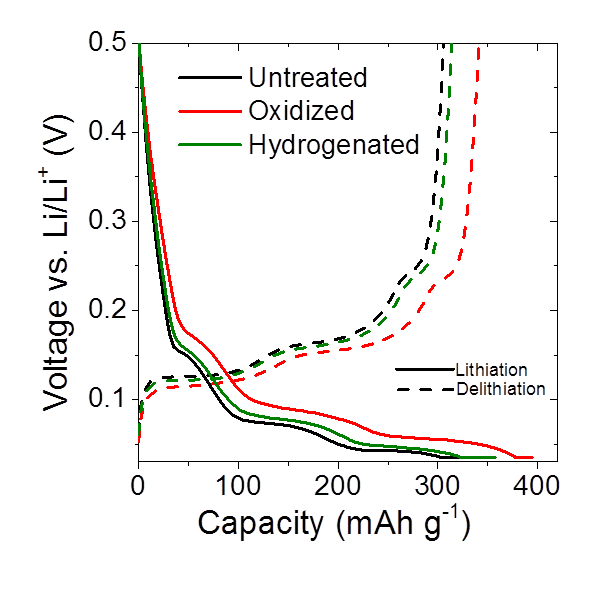


Figure S3. Capacity vs. Voltage (vs Li/Li+) of first cycle lithiation-delithiation between 0.35–0.5 V for the half cells with chemically modified CGP graphite anodes.

Table S2. Electrochemical Impedance Spectroscopy (EIS)-derived equivalent series resistance (ESR) for half cells cycled at C/2 up to 200 cycles.

| **Cathode Surface Chemistry** | **MCMB** | | | **SFG** | | |
| --- | --- | --- | --- | --- | --- | --- |
|  | Initial R | Final R | Change | Initial R | Final R | Change |
| Untreated | 22.7 Ω | 41.6 Ω | +18.7 | 21.2 Ω | 26.6 Ω | +5.4 Ω |
| Oxidized | 28.0 Ω | 32.9 Ω | +4.9 Ω | 21.9 Ω | 39.1 Ω | +17.8 Ω |
| Hydrogenated | 23.7 Ω | 32.4 Ω | +10.1 Ω | 22.4 | 20.1 | -2.3 Ω |


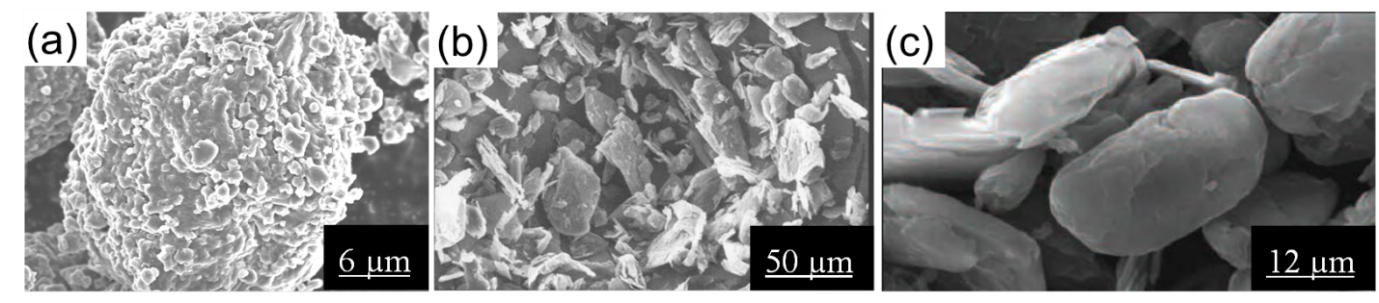


Figure S4. Scanning electron microscopy (SEM) images of (a) MCMB (cathode), (b) SFG (cathode), and (c) CGP (anode).


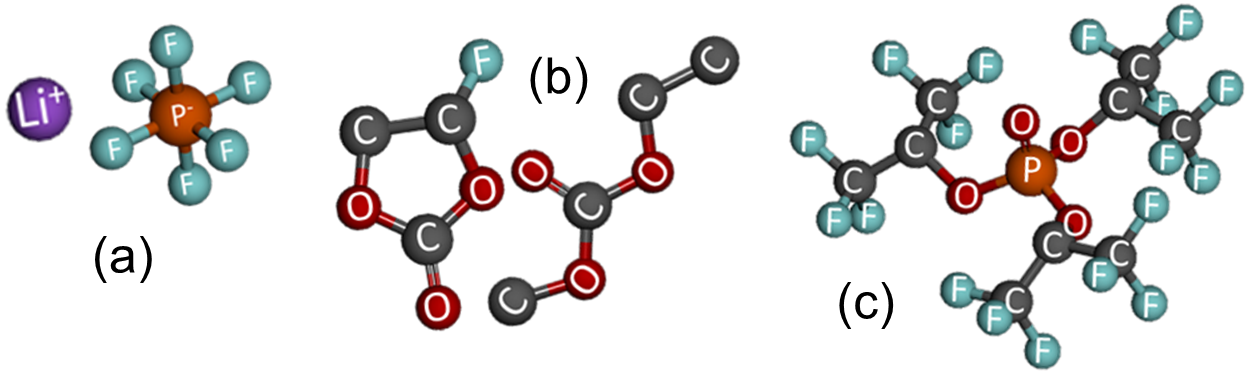


Figure S5. Schematics of molecules of electrolyte components used in this study. (a) The [Li+][PF6-] salt that acted as the main electrolyte and source of ions; (b) The monofluoroethylenecarbonate (FEC) and ethylmethyl carbonate (EMC) solvents; (c) The tris(hexafluoro-iso-propyl)phosphate (HFIP) “sacrificial” additive that improved the stability of the formed SEI layer. ACCELRYS software was used to make all schematics.


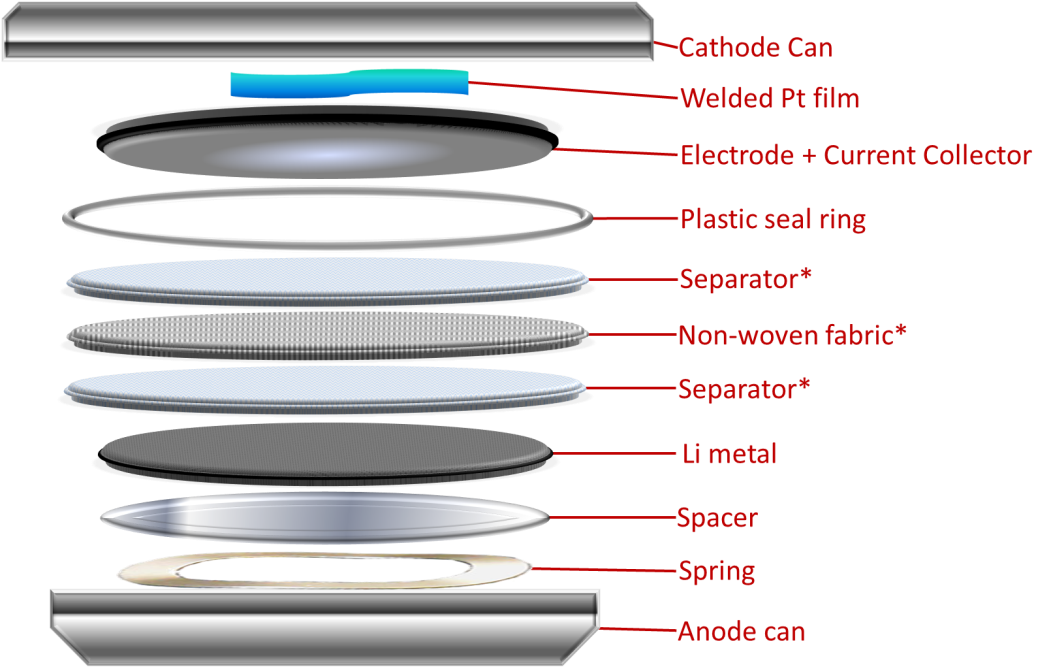


Figure S6. Schematic of coin-cell assembly of cathode testing using the half-cell configuration. Sections denoted with an (*) were soaked with electrolyte.
